# Supplementary material
Source: PubMed Central journal article supplement (PMC2527254)

## Supplementary Material

**Figure S1:** Steady-state fluorescence anisotropy of TMA-DPH in POPC/NCer binary mixtures at 5.9 °C (▲) and 17.9 °C (◆). The dotted lines are only a guide to the eye.

**Figure S1**

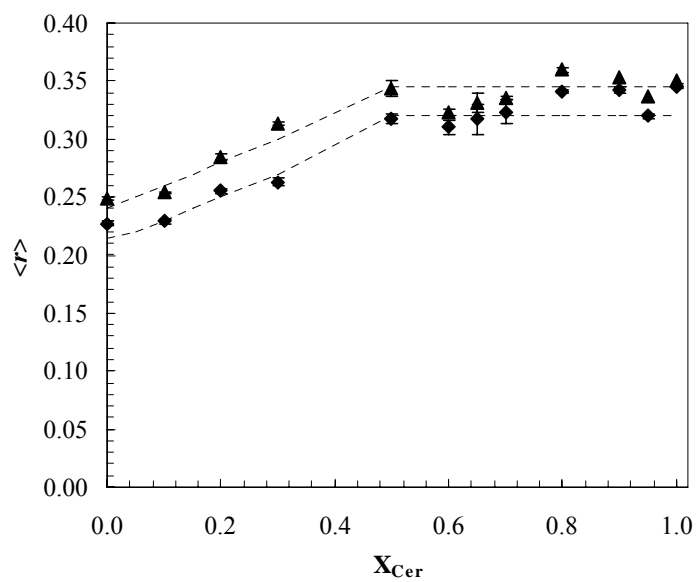

Supplement: 108.129858_1.pdf [file 108.129858_1.pdf]
